# Supplementary material
Source: HighWire-hosted journal article supplement (https://jnm.snmjournals.org/highwire/filestream/101945/field_highwire_adjunct_files/0/246603_Supplemental_Data.pdf)
Supplement: 246603_Supplemental_Data.pdf [file 246603_Supplemental_Data.pdf]

**SUPPLEMENTAL TABLE 1. Lesions size and SUV<sub>max</sub> on a patient-basis categorized by Prostate Cancer Molecular Imaging Standardized Evaluation (PROMISE).**

|             | Mean size in cm (IQR) |               |                 | Mean SUV <sub>max</sub> (IQR) |
|-------------|-----------------------|---------------|-----------------|-------------------------------|
|             | CT (n=52)             | wbMRI (n=15)  | PSMA-PET (n=67) | PSMA-PET (n=67)               |
| <b>T/Tr</b> | 2.5 (2.3-3.6)         |               | 2.4 (1.6-3.3)   | 12 (9-19)                     |
| <b>N1</b>   | 1.7 (1.1-2.5)         | 1.7 (1.1-2.4) | 1.3 (0.7-1.7)   | 16 (11-24)                    |
| <b>M1a</b>  | 1.2 (0.9-1.9)         | 1.2 (0.9-1.8) | 1.3 (0.8-1.6)   | 17 (12-29) p<0.001            |
| <b>M1b</b>  |                       |               |                 | 30 (23-43)                    |
| <b>M1c</b>  | 3.1 (1.5-4.6)         | 0.7           | 3.2 (1.7-4.3)   | 21 (14-24)                    |

**SUPPLEMENTAL TABLE 2. Comparison between PSMA-PET and CI for whole-body CRPC staging categorized by PCWG3 clinical subtype. PROMISE stage is given in parenthesis.**

|                              | All patients (n=67) |         | CT/BS cohort (n=52) |         |         | wbMRI cohort (n=15) |         |
|------------------------------|---------------------|---------|---------------------|---------|---------|---------------------|---------|
|                              | PET (%)             | CI (%)  | PET (%)             | CT (%)  | BS (%)  | PET (%)             | MRI (%) |
| <b>Non-metastatic</b>        | 5 (7)               | 9 (13)  | 2 (4)               | 2 (4)   | 5 (10)  | 3 (20)              | 8 (53)  |
| <b>Local (T/Tr only)</b>     | 3 (5)               | 0       | 0                   | 0       | 0       | 3 (20)              | 0       |
| <b>Nodal (N1/M1a ± T/Tr)</b> | 7 (10)              | 4 (6)   | 2 (4)               | 2 (4)   | 0       | 5 (33)              | 3 (20)  |
| N1 only                      | 3 (5)               | 3 (4)   | 0                   | 0       | 0       | 3 (20)              | 2 (13)  |
| M1a only                     | 2 (3)               | 3 (4)   | 1 (2)               | 1 (2)   | 0       | 1 (7)               | 1 (7)   |
| <b>Bone (any M1b)</b>        | 40 (60)             | 39 (58) | 38 (73)             | 35 (67) | 47 (90) | 2 (13)              | 2 (13)  |
| <b>Visceral (any M1c)</b>    | 12 (18)             | 15 (22) | 10 (19)             | 13 (25) | 0       | 2 (13)              | 2 (13)  |

BS, bone scan; CI, conventional imaging.

**SUPPLEMENTAL TABLE 3. Comparison between non-contrast CT (n=8) and contrast-enhanced CT (n=44) for whole-body CRPC staging categorized by PCWG3 clinical subtype. PROMISE stage is given in parenthesis.**

|                              | Non-contrast PET/CT (n=8) |        | Contrast-enhanced PET/CT (n=44) |          |
|------------------------------|---------------------------|--------|---------------------------------|----------|
|                              | PET (%)                   | CT (%) | PET (%)                         | CT (%)   |
| <b>Non-metastatic</b>        | 0                         | 2 (25) | 2 (5)                           | 0        |
| <b>Local (T/Tr only)</b>     | 0                         | 0      | 0                               | 0        |
| <b>Nodal (N1/M1a ± T/Tr)</b> | 1 (13)                    | 0      | 1 (2)                           | 2 (5)    |
| N1 only                      | 0                         | 0      | 0                               | 0        |
| M1a only                     | 1 (13)                    | 0      | 0                               | 1 (2)    |
| <b>Bone (any M1b)</b>        | 5 (63)                    | 5 (63) | 33 (75)                         | 30 (68)  |
| <b>Visceral (any M1c)</b>    | 2 (25)                    | 1 (13) | 8 (18)                          | 12 (27)  |
| <b>Overall positivity</b>    | 8 (100)                   | 6 (75) | 42 (95)                         | 44 (100) |

**SUPPLEMENTAL TABLE 4. PSMA-PET impact on PCWG3 clinical subtype.** n patients are listed in each cell. No change for PET vs. CI is given in grey cells.

|          |                          | PSMA-PET             |              |              |             |                 |
|----------|--------------------------|----------------------|--------------|--------------|-------------|-----------------|
|          |                          | (1)<br>nonmetastatic | (2)<br>local | (3)<br>nodal | (4)<br>bone | (5)<br>visceral |
| <b>̄</b> | <b>(1) nonmetastatic</b> | <b>3</b>             | <b>2*</b>    | <b>3*</b>    | <b>1*</b>   | <b>0</b>        |
|          | <b>(2) local</b>         | <b>0</b>             | <b>0</b>     | <b>0</b>     | <b>0</b>    | <b>0</b>        |
|          | <b>(3) nodal</b>         | <b>0</b>             | <b>0</b>     | <b>3</b>     | <b>0</b>    | <b>1*</b>       |
|          | <b>(4) bone</b>          | <b>2†</b>            | <b>0</b>     | <b>1†</b>    | <b>33</b>   | <b>3*</b>       |
|          | <b>(5) visceral</b>      | <b>0</b>             | <b>1†</b>    | <b>0</b>     | <b>6†</b>   | <b>8</b>        |

\* PET upstaging; † PET downstaging

**SUPPLEMENTAL TABLE 5.** Lesion validation in patients with visceral lesions at CI and down-staging at PSMA-PET.

| Patient  | PSMA-PET stage |               | CI stage  |                  | Visceral disease site with CI | Type of validation | Validation result for PSMA-PET |
|----------|----------------|---------------|-----------|------------------|-------------------------------|--------------------|--------------------------------|
|          | PROMISE        | PCWG3         | PROMISE   | PCWG3            |                               |                    |                                |
| Essen 13 | T0N1M1ab       | Bone disease  | T0N0M1abc | Visceral disease | Lung                          | NA                 | -                              |
| Essen 21 | TrN0M0         | Local disease | T0N0M1abc | Visceral disease | Lung                          | Imaging            | False negative                 |
| Essen 27 | T0N1M1ab       | Bone disease  | T0N0M1bc  | Visceral disease | Lung                          | NA                 | -                              |
| TUM 03   | T0N1M1b        | Bone disease  | T0N0M1abc | Visceral disease | Adrenal                       | NA                 | -                              |
| TUM 07   | TrN0M1b        | Bone disease  | TrN0M1abc | Visceral disease | Liver                         | Imaging            | False negative                 |
| TUM 21   | T0N1M1ab       | Bone disease  | T0N0M1bc  | Visceral disease | Lung                          | Imaging            | False negative                 |
|          |                |               |           |                  | Liver                         |                    | True negative                  |
| TUM 34   | T0N1M1ab       | Bone disease  | T0N1M1abc | Visceral disease | Lung                          | Imaging            | True negative                  |

Notes: NA=not available

- **SUPPLEMENTAL TABLE 6.** Raw readers findings of all patients for CI (A) and for PSMA-PET (B).

## SUPPLEMENTAL TABLE 6A

|             | Imaging modality | r1_T /Tr | r2_T /Tr | r3_T /Tr | consensus_T/Tr | r1_N | r2_N | r3_N | consensus_N | r1_Bone | r2_Bone | r3_Bone | consensus_Bone | r1_Visceral | r2_Visceral | r3_Visceral | consensus_visceral |
|-------------|------------------|----------|----------|----------|----------------|------|------|------|-------------|---------|---------|---------|----------------|-------------|-------------|-------------|--------------------|
| patient 001 | BS               | 0        | 0        | 0        | 0              | 0    | 0    | 0    | 0           | 0       | 0       | 0       | 0              | 0           | 0           | 0           | 0                  |
| patient 003 | BS               | 0        | 0        | 0        | 0              | 0    | 0    | 0    | 0           | 1       | 1       | 1       | 1              | 0           | 0           | 0           | 0                  |
| patient 005 | BS               | 0        | 0        | 0        | 0              | 0    | 0    | 0    | 0           | 1       | 1       | 1       | 1              | 0           | 0           | 0           | 0                  |
| patient 007 | BS               | 0        | 0        | 0        | 0              | 0    | 0    | 0    | 0           | 1       | 1       | 1       | 1              | 0           | 0           | 0           | 0                  |
| patient 009 | BS               | 0        | 0        | 0        | 0              | 0    | 0    | 0    | 0           | 1       | 1       | 1       | 1              | 0           | 0           | 0           | 0                  |
| patient 011 | BS               | 0        | 0        | 0        | 0              | 0    | 0    | 0    | 0           | 1       | 1       | 1       | 1              | 0           | 0           | 0           | 0                  |
| patient 013 | BS               | 0        | 0        | 0        | 0              | 0    | 0    | 0    | 0           | 1       | 1       | 1       | 1              | 0           | 0           | 0           | 0                  |
| patient 015 | BS               | 0        | 0        | 0        | 0              | 0    | 0    | 0    | 0           | 1       | 1       | 1       | 1              | 0           | 0           | 0           | 0                  |
| patient 018 | BS               | 0        | 0        | 0        | 0              | 0    | 0    | 0    | 0           | 1       | 1       | 1       | 1              | 0           | 0           | 0           | 0                  |
| patient 021 | BS               | 0        | 0        | 0        | 0              | 0    | 0    | 0    | 0           | 1       | 1       | 1       | 1              | 0           | 0           | 0           | 0                  |
| patient 030 | BS               | 0        | 0        | 0        | 0              | 0    | 0    | 0    | 0           | 1       | 0       | 0       | 0              | 0           | 0           | 0           | 0                  |
| patient 033 | BS               | 0        | 0        | 0        | 0              | 0    | 0    | 0    | 0           | 1       | 1       | 0       | 1              | 0           | 0           | 0           | 0                  |
| patient 037 | BS               | 0        | 0        | 0        | 0              | 0    | 0    | 0    | 0           | 0       | 1       | 0       | 0              | 0           | 0           | 0           | 0                  |
| patient 041 | BS               | 0        | 0        | 0        | 0              | 0    | 0    | 0    | 0           | 1       | 1       | 1       | 1              | 0           | 0           | 0           | 0                  |
| patient 044 | BS               | 0        | 0        | 0        | 0              | 0    | 0    | 0    | 0           | 1       | 1       | 1       | 1              | 0           | 0           | 0           | 0                  |
| patient 046 | BS               | 0        | 0        | 0        | 0              | 0    | 0    | 0    | 0           | 1       | 1       | 1       | 1              | 0           | 0           | 0           | 0                  |
| patient 048 | BS               | 0        | 0        | 0        | 0              | 0    | 0    | 0    | 0           | 1       | 1       | 1       | 1              | 0           | 0           | 0           | 0                  |
| patient 050 | BS               | 0        | 0        | 0        | 0              | 0    | 0    | 0    | 0           | 1       | 1       | 1       | 1              | 0           | 0           | 0           | 0                  |
| patient 052 | BS               | 0        | 0        | 0        | 0              | 0    | 0    | 0    | 0           | 1       | 1       | 1       | 1              | 0           | 0           | 0           | 0                  |
| patient 054 | BS               | 0        | 0        | 0        | 0              | 0    | 0    | 0    | 0           | 1       | 1       | 1       | 1              | 0           | 0           | 0           | 0                  |
| patient 056 | BS               | 0        | 0        | 0        | 0              | 0    | 0    | 0    | 0           | 1       | 1       | 1       | 1              | 0           | 0           | 0           | 0                  |
| patient 058 | BS               | 0        | 0        | 0        | 0              | 0    | 0    | 0    | 0           | 0       | 1       | 0       | 0              | 0           | 0           | 0           | 0                  |
| patient 060 | BS               | 0        | 0        | 0        | 0              | 0    | 0    | 0    | 0           | 0       | 1       | 1       | 1              | 0           | 0           | 0           | 0                  |
| patient 062 | BS               | 0        | 0        | 0        | 0              | 0    | 0    | 0    | 0           | 1       | 1       | 1       | 1              | 0           | 0           | 0           | 0                  |
| patient 064 | BS               | 0        | 0        | 0        | 0              | 0    | 0    | 0    | 0           | 1       | 1       | 1       | 1              | 0           | 0           | 0           | 0                  |
| patient 066 | BS               | 0        | 0        | 0        | 0              | 0    | 0    | 0    | 0           | 1       | 1       | 1       | 1              | 0           | 0           | 0           | 0                  |
| patient 068 | BS               | 0        | 0        | 0        | 0              | 0    | 0    | 0    | 0           | 1       | 1       | 1       | 1              | 0           | 0           | 0           | 0                  |
| patient 070 | BS               | 0        | 0        | 0        | 0              | 0    | 0    | 0    | 0           | 1       | 1       | 1       | 1              | 0           | 0           | 0           | 0                  |
| patient 072 | BS               | 0        | 0        | 0        | 0              | 0    | 0    | 0    | 0           | 1       | 1       | 1       | 1              | 0           | 0           | 0           | 0                  |
| patient 074 | BS               | 0        | 0        | 0        | 0              | 0    | 0    | 0    | 0           | 1       | 1       | 1       | 1              | 0           | 0           | 0           | 0                  |
| patient 076 | BS               | 0        | 0        | 0        | 0              | 0    | 0    | 0    | 0           | 1       | 1       | 1       | 1              | 0           | 0           | 0           | 0                  |
| patient 078 | BS               | 0        | 0        | 0        | 0              | 0    | 0    | 0    | 0           | 0       | 1       | 1       | 1              | 0           | 0           | 0           | 0                  |
| patient 080 | BS               | 0        | 0        | 0        | 0              | 0    | 0    | 0    | 0           | 1       | 1       | 1       | 1              | 0           | 0           | 0           | 0                  |
| patient 082 | BS               | 0        | 0        | 0        | 0              | 0    | 0    | 0    | 0           | 1       | 1       | 1       | 1              | 0           | 0           | 0           | 0                  |
| patient 084 | BS               | 0        | 0        | 0        | 0              | 0    | 0    | 0    | 0           | 1       | 1       | 1       | 1              | 0           | 0           | 0           | 0                  |
| patient 086 | BS               | 0        | 0        | 0        | 0              | 0    | 0    | 0    | 0           | 1       | 1       | 1       | 1              | 0           | 0           | 0           | 0                  |
| patient 088 | BS               | 0        | 0        | 0        | 0              | 0    | 0    | 0    | 0           | 1       | 1       | 1       | 1              | 0           | 0           | 0           | 0                  |
| patient 090 | BS               | 0        | 0        | 0        | 0              | 0    | 0    | 0    | 0           | 1       | 1       | 1       | 1              | 0           | 0           | 0           | 0                  |

|             |    |   |   |   |   |   |   |   |   |   |   |   |   |   |   |   |   |
|-------------|----|---|---|---|---|---|---|---|---|---|---|---|---|---|---|---|---|
| patient 092 | BS | 0 | 0 | 0 | 0 | 0 | 0 | 0 | 0 | 1 | 1 | 1 | 1 | 0 | 0 | 0 | 0 |
| patient 094 | BS | 0 | 0 | 0 | 0 | 0 | 0 | 0 | 0 | 1 | 1 | 1 | 1 | 0 | 0 | 0 | 0 |
| patient 096 | BS | 0 | 0 | 0 | 0 | 0 | 0 | 0 | 0 | 1 | 1 | 1 | 1 | 0 | 0 | 0 | 0 |
| patient 098 | BS | 0 | 0 | 0 | 0 | 0 | 0 | 0 | 0 | 1 | 1 | 1 | 1 | 0 | 0 | 0 | 0 |
| patient 100 | BS | 0 | 0 | 0 | 0 | 0 | 0 | 0 | 0 | 0 | 1 | 1 | 1 | 0 | 0 | 0 | 0 |
| patient 102 | BS | 0 | 0 | 0 | 0 | 0 | 0 | 0 | 0 | 1 | 1 | 1 | 1 | 0 | 0 | 0 | 0 |
| patient 104 | BS | 0 | 0 | 0 | 0 | 0 | 0 | 0 | 0 | 1 | 1 | 1 | 1 | 0 | 0 | 0 | 0 |
| patient 106 | BS | 0 | 0 | 0 | 0 | 0 | 0 | 0 | 0 | 1 | 1 | 1 | 1 | 0 | 0 | 0 | 0 |
| patient 108 | BS | 0 | 0 | 0 | 0 | 0 | 0 | 0 | 0 | 1 | 1 | 1 | 1 | 0 | 0 | 0 | 0 |
| patient 110 | BS | 0 | 0 | 0 | 0 | 0 | 0 | 0 | 0 | 1 | 1 | 1 | 1 | 0 | 0 | 0 | 0 |
| patient 112 | BS | 0 | 0 | 0 | 0 | 0 | 0 | 0 | 0 | 1 | 1 | 1 | 1 | 0 | 0 | 0 | 0 |
| patient 114 | BS | 0 | 0 | 0 | 0 | 0 | 0 | 0 | 0 | 0 | 0 | 0 | 0 | 0 | 0 | 0 | 0 |
| patient 116 | BS | 0 | 0 | 0 | 0 | 0 | 0 | 0 | 0 | 1 | 1 | 1 | 1 | 0 | 0 | 0 | 0 |
| patient 118 | BS | 0 | 0 | 0 | 0 | 0 | 0 | 0 | 0 | 1 | 1 | 1 | 1 | 0 | 0 | 0 | 0 |
| patient 002 | CT | 0 | 0 | 0 | 0 | 0 | 0 | 0 | 0 | 0 | 0 | 0 | 0 | 0 | 0 | 0 | 0 |
| patient 004 | CT | 0 | 1 | 0 | 0 | 0 | 0 | 0 | 0 | 1 | 1 | 1 | 1 | 1 | 0 | 0 | 0 |
| patient 006 | CT | 0 | 0 | 0 | 0 | 0 | 1 | 0 | 0 | 1 | 1 | 1 | 1 | 0 | 0 | 0 | 0 |
| patient 008 | CT | 0 | 0 | 0 | 0 | 0 | 1 | 0 | 0 | 1 | 1 | 1 | 1 | 0 | 0 | 0 | 0 |
| patient 010 | CT | 0 | 0 | 0 | 0 | 0 | 1 | 0 | 0 | 1 | 1 | 1 | 1 | 1 | 1 | 1 | 1 |
| patient 012 | CT | 0 | 0 | 0 | 0 | 0 | 0 | 0 | 0 | 0 | 0 | 0 | 0 | 0 | 0 | 0 | 0 |
| patient 014 | CT | 0 | 1 | 0 | 0 | 0 | 1 | 0 | 0 | 1 | 1 | 1 | 1 | 0 | 0 | 0 | 0 |
| patient 016 | CT | 0 | 0 | 0 | 0 | 0 | 1 | 0 | 0 | 1 | 1 | 1 | 1 | 0 | 0 | 0 | 0 |
| patient 019 | CT | 0 | 0 | 0 | 0 | 0 | 1 | 1 | 1 | 1 | 1 | 1 | 1 | 0 | 1 | 1 | 1 |
| patient 022 | CT | 1 | 1 | 1 | 1 | 1 | 0 | 0 | 0 | 1 | 1 | 1 | 1 | 1 | 1 | 1 | 1 |
| patient 031 | CT | 0 | 1 | 0 | 0 | 1 | 1 | 1 | 1 | 1 | 1 | 1 | 1 | 1 | 1 | 0 | 1 |
| patient 034 | CT | 0 | 0 | 0 | 0 | 1 | 1 | 1 | 1 | 1 | 1 | 1 | 1 | 1 | 1 | 0 | 1 |
| patient 038 | CT | 0 | 0 | 0 | 0 | 0 | 1 | 0 | 0 | 1 | 1 | 0 | 1 | 1 | 1 | 0 | 1 |
| patient 042 | CT | 0 | 0 | 0 | 0 | 0 | 1 | 0 | 0 | 1 | 1 | 1 | 1 | 1 | 1 | 0 | 1 |
| patient 045 | CT | 1 | 1 | 1 | 1 | 0 | 1 | 1 | 1 | 1 | 1 | 1 | 1 | 0 | 1 | 0 | 0 |
| patient 047 | CT | 0 | 1 | 0 | 0 | 0 | 0 | 0 | 0 | 1 | 1 | 1 | 1 | 0 | 0 | 0 | 0 |
| patient 049 | CT | 0 | 1 | 0 | 0 | 0 | 0 | 0 | 0 | 1 | 1 | 1 | 1 | 0 | 1 | 0 | 0 |
| patient 051 | CT | 0 | 1 | 0 | 0 | 0 | 0 | 0 | 0 | 1 | 1 | 1 | 1 | 0 | 0 | 0 | 0 |
| patient 053 | CT | 0 | 0 | 0 | 0 | 0 | 1 | 0 | 0 | 1 | 1 | 1 | 1 | 0 | 1 | 1 | 1 |
| patient 055 | CT | 1 | 1 | 1 | 1 | 1 | 1 | 0 | 1 | 1 | 1 | 1 | 1 | 1 | 1 | 1 | 1 |
| patient 057 | CT | 0 | 1 | 0 | 0 | 0 | 1 | 0 | 0 | 1 | 1 | 1 | 1 | 0 | 0 | 0 | 0 |
| patient 059 | CT | 1 | 1 | 1 | 1 | 0 | 0 | 0 | 0 | 1 | 1 | 0 | 1 | 0 | 0 | 0 | 0 |
| patient 061 | CT | 0 | 0 | 0 | 0 | 1 | 1 | 1 | 1 | 1 | 1 | 1 | 1 | 1 | 1 | 1 | 1 |
| patient 063 | CT | 0 | 0 | 0 | 0 | 0 | 0 | 0 | 0 | 1 | 1 | 1 | 1 | 0 | 0 | 0 | 0 |
| patient 065 | CT | 0 | 1 | 0 | 0 | 0 | 0 | 0 | 0 | 1 | 1 | 1 | 1 | 0 | 0 | 0 | 0 |
| patient 067 | CT | 1 | 0 | 0 | 0 | 1 | 1 | 0 | 1 | 1 | 1 | 1 | 1 | 0 | 0 | 0 | 0 |
| patient 069 | CT | 0 | 1 | 0 | 0 | 0 | 0 | 0 | 0 | 1 | 1 | 1 | 1 | 0 | 0 | 0 | 0 |



|             |       |   |   |   |   |   |   |   |   |   |   |   |   |   |   |   |
|-------------|-------|---|---|---|---|---|---|---|---|---|---|---|---|---|---|---|
| patient 071 | CT    | 0 | 0 | 0 | 0 | 1 | 1 | 1 | 1 | 1 | 1 | 1 | 0 | 0 | 0 | 0 |
| patient 073 | CT    | 0 | 0 | 0 | 0 | 1 | 0 | 0 | 0 | 1 | 1 | 1 | 1 | 1 | 1 | 1 |
| patient 075 | CT    | 0 | 0 | 0 | 0 | 0 | 1 | 1 | 1 | 1 | 1 | 1 | 1 | 1 | 1 | 1 |
| patient 077 | CT    | 1 | 1 | 1 | 1 | 0 | 1 | 0 | 0 | 1 | 1 | 1 | 1 | 1 | 0 | 0 |
| patient 079 | CT    | 0 | 0 | 0 | 0 | 0 | 1 | 0 | 0 | 0 | 1 | 1 | 1 | 0 | 0 | 0 |
| patient 081 | CT    | 0 | 0 | 0 | 0 | 0 | 0 | 0 | 0 | 1 | 1 | 1 | 1 | 0 | 0 | 0 |
| patient 083 | CT    | 0 | 0 | 0 | 0 | 1 | 1 | 1 | 1 | 1 | 1 | 1 | 1 | 0 | 0 | 0 |
| patient 085 | CT    | 1 | 1 | 0 | 1 | 0 | 0 | 0 | 0 | 1 | 1 | 1 | 1 | 0 | 0 | 0 |
| patient 087 | CT    | 0 | 0 | 0 | 0 | 1 | 1 | 0 | 1 | 1 | 1 | 1 | 1 | 0 | 0 | 0 |
| patient 089 | CT    | 0 | 0 | 0 | 0 | 0 | 1 | 0 | 0 | 1 | 1 | 1 | 1 | 0 | 0 | 0 |
| patient 091 | CT    | 1 | 1 | 0 | 1 | 0 | 1 | 0 | 0 | 1 | 1 | 1 | 1 | 0 | 0 | 0 |
| patient 093 | CT    | 1 | 1 | 0 | 1 | 0 | 1 | 0 | 0 | 1 | 1 | 1 | 1 | 0 | 0 | 0 |
| patient 095 | CT    | 1 | 1 | 0 | 1 | 0 | 0 | 0 | 0 | 1 | 1 | 1 | 1 | 0 | 0 | 0 |
| patient 097 | CT    | 0 | 0 | 0 | 0 | 1 | 1 | 1 | 1 | 1 | 1 | 1 | 1 | 0 | 0 | 0 |
| patient 099 | CT    | 0 | 0 | 0 | 0 | 0 | 0 | 0 | 0 | 1 | 1 | 1 | 1 | 0 | 0 | 0 |
| patient 101 | CT    | 0 | 0 | 0 | 0 | 1 | 1 | 1 | 1 | 1 | 1 | 1 | 1 | 1 | 1 | 1 |
| patient 103 | CT    | 0 | 0 | 0 | 0 | 0 | 0 | 1 | 0 | 1 | 1 | 1 | 1 | 1 | 1 | 0 |
| patient 105 | CT    | 0 | 0 | 0 | 0 | 1 | 1 | 0 | 1 | 1 | 1 | 1 | 1 | 0 | 0 | 0 |
| patient 107 | CT    | 0 | 0 | 0 | 0 | 1 | 1 | 1 | 1 | 1 | 1 | 1 | 1 | 0 | 0 | 0 |
| patient 109 | CT    | 0 | 0 | 0 | 0 | 0 | 0 | 1 | 0 | 1 | 1 | 1 | 1 | 0 | 0 | 0 |
| patient 111 | CT    | 0 | 0 | 0 | 0 | 0 | 1 | 1 | 1 | 1 | 1 | 1 | 1 | 0 | 0 | 0 |
| patient 113 | CT    | 0 | 0 | 0 | 0 | 1 | 1 | 0 | 1 | 1 | 1 | 1 | 1 | 0 | 0 | 0 |
| patient 115 | CT    | 0 | 0 | 0 | 0 | 1 | 1 | 1 | 1 | 0 | 0 | 0 | 0 | 1 | 1 | 1 |
| patient 117 | CT    | 0 | 0 | 0 | 0 | 1 | 1 | 1 | 1 | 1 | 1 | 1 | 1 | 0 | 0 | 0 |
| patient 119 | CT    | 0 | 0 | 0 | 0 | 1 | 1 | 1 | 1 | 1 | 1 | 1 | 1 | 0 | 0 | 0 |
| patient 017 | wbMRI | 0 | 0 | 0 | 0 | 1 | 1 | 0 | 1 | 1 | 1 | 1 | 1 | 0 | 0 | 0 |
| patient 020 | wbMRI | 0 | 0 | 0 | 0 | 1 | 1 | 1 | 1 | 1 | 1 | 1 | 1 | 0 | 0 | 0 |
| patient 023 | wbMRI | 0 | 0 | 0 | 0 | 1 | 1 | 0 | 1 | 1 | 1 | 1 | 1 | 0 | 0 | 0 |
| patient 024 | wbMRI | 0 | 0 | 0 | 0 | 1 | 1 | 0 | 1 | 0 | 0 | 0 | 0 | 1 | 0 | 0 |
| patient 025 | wbMRI | 0 | 0 | 0 | 0 | 0 | 1 | 0 | 0 | 0 | 0 | 0 | 0 | 0 | 0 | 0 |
| patient 026 | wbMRI | 0 | 0 | 0 | 0 | 0 | 0 | 0 | 0 | 0 | 0 | 0 | 0 | 0 | 0 | 0 |
| patient 027 | wbMRI | 1 | 0 | 0 | 0 | 0 | 0 | 0 | 0 | 1 | 0 | 0 | 0 | 0 | 0 | 0 |
| patient 028 | wbMRI | 0 | 0 | 0 | 0 | 0 | 0 | 0 | 0 | 1 | 0 | 0 | 0 | 0 | 0 | 0 |
| patient 029 | wbMRI | 0 | 0 | 0 | 0 | 1 | 1 | 0 | 1 | 1 | 1 | 1 | 1 | 1 | 0 | 0 |
| patient 032 | wbMRI | 0 | 0 | 0 | 0 | 0 | 0 | 0 | 0 | 0 | 0 | 0 | 0 | 0 | 0 | 0 |
| patient 035 | wbMRI | 0 | 0 | 0 | 0 | 0 | 1 | 1 | 1 | 0 | 0 | 0 | 0 | 0 | 0 | 0 |
| patient 036 | wbMRI | 0 | 0 | 0 | 0 | 0 | 1 | 0 | 0 | 0 | 1 | 0 | 0 | 0 | 0 | 0 |
| patient 039 | wbMRI | 0 | 0 | 0 | 0 | 0 | 1 | 0 | 0 | 0 | 0 | 0 | 0 | 0 | 0 | 0 |
| patient 040 | wbMRI | 0 | 0 | 0 | 0 | 1 | 1 | 1 | 1 | 1 | 1 | 1 | 1 | 0 | 0 | 0 |
| patient 043 | wbMRI | 0 | 0 | 0 | 0 | 0 | 0 | 0 | 0 | 0 | 0 | 0 | 0 | 0 | 0 | 0 |



## SUPPLEMENTAL TABLE 6B

|             | Imaging modality | r1_T /Tr | r2_T /Tr | r3_T /Tr | consensus_T/Tr | r1_N | r2_N | r3_N | consensus_N | r1_Bone | r2_Bone | r3_Bone | consensus_Bone | r1_Visceral | r2_Visceral | r3_Visceral | consensus_visceral |
|-------------|------------------|----------|----------|----------|----------------|------|------|------|-------------|---------|---------|---------|----------------|-------------|-------------|-------------|--------------------|
| patient 001 | PSMA-PET         | 0        | 0        | 0        | 0              | 0    | 0    | 0    | 0           | 1       | 1       | 1       | 1              | 1           | 1           | 0           | 1                  |
| patient 002 | PSMA-PET         | 1        | 1        | 1        | 1              | 1    | 1    | 1    | 1           | 1       | 1       | 1       | 1              | 0           | 0           | 0           | 0                  |
| patient 003 | PSMA-PET         | 1        | 1        | 0        | 1              | 0    | 1    | 1    | 1           | 1       | 1       | 1       | 1              | 1           | 1           | 1           | 1                  |
| patient 004 | PSMA-PET         | 1        | 1        | 1        | 1              | 0    | 0    | 0    | 0           | 1       | 1       | 1       | 1              | 1           | 0           | 0           | 0                  |
| patient 005 | PSMA-PET         | 0        | 0        | 0        | 0              | 1    | 0    | 1    | 1           | 0       | 0       | 0       | 0              | 0           | 0           | 0           | 0                  |
| patient 006 | PSMA-PET         | 0        | 1        | 0        | 0              | 0    | 0    | 0    | 0           | 1       | 1       | 1       | 1              | 0           | 0           | 0           | 0                  |
| patient 007 | PSMA-PET         | 0        | 1        | 0        | 0              | 0    | 0    | 0    | 0           | 1       | 1       | 1       | 1              | 0           | 0           | 0           | 0                  |
| patient 008 | PSMA-PET         | 0        | 0        | 0        | 0              | 0    | 0    | 0    | 0           | 1       | 1       | 1       | 1              | 1           | 0           | 0           | 0                  |
| patient 009 | PSMA-PET         | 0        | 0        | 0        | 0              | 0    | 0    | 0    | 0           | 0       | 0       | 0       | 0              | 0           | 0           | 0           | 0                  |
| patient 010 | PSMA-PET         | 1        | 1        | 1        | 1              | 1    | 0    | 1    | 1           | 1       | 1       | 1       | 1              | 0           | 0           | 0           | 0                  |
| patient 011 | PSMA-PET         | 0        | 0        | 0        | 0              | 1    | 1    | 1    | 1           | 0       | 0       | 0       | 0              | 1           | 1           | 1           | 1                  |
| patient 012 | PSMA-PET         | 1        | 1        | 1        | 1              | 0    | 0    | 0    | 0           | 0       | 0       | 0       | 0              | 0           | 0           | 0           | 0                  |
| patient 013 | PSMA-PET         | 0        | 0        | 0        | 0              | 1    | 1    | 1    | 1           | 1       | 1       | 1       | 1              | 0           | 0           | 0           | 0                  |
| patient 014 | PSMA-PET         | 1        | 1        | 1        | 1              | 1    | 1    | 0    | 1           | 1       | 1       | 1       | 1              | 1           | 0           | 1           | 1                  |
| patient 015 | PSMA-PET         | 0        | 0        | 0        | 0              | 1    | 1    | 1    | 1           | 0       | 0       | 0       | 0              | 0           | 0           | 0           | 0                  |
| patient 016 | PSMA-PET         | 0        | 0        | 0        | 0              | 1    | 1    | 1    | 1           | 0       | 0       | 0       | 0              | 0           | 0           | 0           | 0                  |
| patient 017 | PSMA-PET         | 0        | 0        | 0        | 0              | 1    | 1    | 1    | 1           | 1       | 1       | 1       | 1              | 0           | 0           | 0           | 0                  |
| patient 018 | PSMA-PET         | 0        | 0        | 0        | 0              | 0    | 0    | 0    | 0           | 0       | 0       | 0       | 0              | 0           | 0           | 0           | 0                  |
| patient 019 | PSMA-PET         | 0        | 0        | 1        | 0              | 1    | 1    | 1    | 1           | 0       | 0       | 0       | 0              | 1           | 1           | 1           | 1                  |
| patient 020 | PSMA-PET         | 0        | 0        | 0        | 0              | 1    | 1    | 1    | 1           | 1       | 1       | 1       | 1              | 0           | 0           | 0           | 0                  |
| patient 021 | PSMA-PET         | 1        | 0        | 0        | 0              | 0    | 0    | 0    | 0           | 0       | 0       | 0       | 0              | 0           | 0           | 0           | 0                  |
| patient 022 | PSMA-PET         | 1        | 1        | 1        | 1              | 0    | 0    | 0    | 0           | 0       | 0       | 0       | 0              | 0           | 0           | 0           | 0                  |
| patient 023 | PSMA-PET         | 0        | 0        | 0        | 0              | 0    | 0    | 0    | 0           | 0       | 0       | 0       | 0              | 1           | 1           | 1           | 1                  |
| patient 024 | PSMA-PET         | 1        | 1        | 1        | 1              | 0    | 0    | 0    | 0           | 0       | 0       | 0       | 0              | 0           | 0           | 0           | 0                  |
| patient 025 | PSMA-PET         | 0        | 0        | 0        | 0              | 1    | 1    | 1    | 1           | 0       | 0       | 0       | 0              | 0           | 0           | 0           | 0                  |
| patient 026 | PSMA-PET         | 0        | 0        | 0        | 0              | 0    | 0    | 0    | 0           | 1       | 1       | 1       | 1              | 0           | 0           | 0           | 0                  |
| patient 027 | PSMA-PET         | 0        | 0        | 0        | 0              | 0    | 0    | 0    | 0           | 0       | 0       | 1       | 0              | 0           | 0           | 0           | 0                  |
| patient 028 | PSMA-PET         | 0        | 0        | 0        | 0              | 1    | 1    | 1    | 1           | 1       | 1       | 1       | 1              | 0           | 0           | 0           | 0                  |
| patient 029 | PSMA-PET         | 0        | 0        | 0        | 0              | 1    | 1    | 1    | 1           | 1       | 0       | 0       | 0              | 0           | 0           | 0           | 0                  |
| patient 030 | PSMA-PET         | 0        | 0        | 0        | 0              | 1    | 1    | 1    | 1           | 1       | 1       | 1       | 1              | 0           | 1           | 1           | 1                  |
| patient 031 | PSMA-PET         | 0        | 0        | 0        | 0              | 1    | 1    | 1    | 1           | 0       | 0       | 0       | 0              | 0           | 0           | 0           | 0                  |
| patient 032 | PSMA-PET         | 1        | 0        | 0        | 0              | 0    | 1    | 0    | 0           | 1       | 1       | 1       | 1              | 0           | 0           | 0           | 0                  |
| patient 033 | PSMA-PET         | 1        | 1        | 1        | 1              | 1    | 1    | 1    | 1           | 1       | 1       | 1       | 1              | 0           | 0           | 0           | 0                  |
| patient 034 | PSMA-PET         | 0        | 0        | 0        | 0              | 1    | 1    | 1    | 1           | 1       | 1       | 1       | 1              | 0           | 1           | 0           | 0                  |
| patient 035 | PSMA-PET         | 0        | 0        | 0        | 0              | 0    | 0    | 0    | 0           | 1       | 1       | 1       | 1              | 0           | 0           | 0           | 0                  |
| patient 036 | PSMA-PET         | 0        | 0        | 0        | 0              | 0    | 0    | 0    | 0           | 1       | 1       | 1       | 1              | 0           | 0           | 1           | 0                  |
| patient 037 | PSMA-PET         | 0        | 0        | 0        | 0              | 0    | 0    | 0    | 0           | 1       | 1       | 1       | 1              | 0           | 0           | 0           | 0                  |
| patient 038 | PSMA-PET         | 1        | 1        | 1        | 1              | 1    | 0    | 0    | 0           | 1       | 1       | 1       | 1              | 1           | 0           | 0           | 0                  |
| patient     | PSMA-            | 0        | 0        | 0        | 0              | 0    | 1    | 0    | 0           | 1       | 1       | 1       | 1              | 0           | 1           | 0           | 0                  |

| 039         |          | PET |   |   |   |   |   |   |   |   |   |   |   |   |   |   |   |   |
|-------------|----------|-----|---|---|---|---|---|---|---|---|---|---|---|---|---|---|---|---|
| patient 040 | PSMA-PET | 1   | 1 | 1 | 1 | 1 | 1 | 0 | 1 | 1 | 1 | 1 | 1 | 1 | 0 | 0 | 0 | 0 |
| patient 041 | PSMA-PET | 1   | 1 | 1 | 1 | 1 | 1 | 1 | 1 | 1 | 1 | 1 | 1 | 1 | 0 | 0 | 0 | 0 |
| patient 042 | PSMA-PET | 0   | 0 | 0 | 0 | 1 | 1 | 1 | 1 | 1 | 1 | 1 | 1 | 1 | 0 | 0 | 0 | 0 |
| patient 043 | PSMA-PET | 0   | 0 | 0 | 0 | 0 | 0 | 0 | 0 | 0 | 0 | 0 | 0 | 0 | 0 | 0 | 0 | 0 |
| patient 044 | PSMA-PET | 0   | 0 | 0 | 0 | 0 | 0 | 0 | 0 | 0 | 1 | 1 | 1 | 1 | 0 | 0 | 0 | 0 |
| patient 045 | PSMA-PET | 0   | 0 | 0 | 0 | 1 | 1 | 1 | 1 | 1 | 1 | 1 | 1 | 1 | 0 | 0 | 0 | 0 |
| patient 046 | PSMA-PET | 1   | 1 | 1 | 1 | 1 | 1 | 1 | 1 | 1 | 1 | 1 | 1 | 1 | 0 | 0 | 0 | 0 |
| patient 047 | PSMA-PET | 1   | 1 | 1 | 1 | 0 | 0 | 0 | 0 | 0 | 1 | 1 | 1 | 1 | 0 | 0 | 0 | 0 |
| patient 048 | PSMA-PET | 1   | 1 | 1 | 1 | 1 | 1 | 1 | 0 | 1 | 1 | 1 | 1 | 1 | 0 | 0 | 0 | 0 |
| patient 049 | PSMA-PET | 0   | 0 | 0 | 0 | 1 | 1 | 1 | 1 | 1 | 0 | 0 | 0 | 0 | 1 | 1 | 0 | 1 |
| patient 050 | PSMA-PET | 0   | 0 | 0 | 0 | 0 | 0 | 0 | 0 | 0 | 1 | 1 | 1 | 1 | 1 | 0 | 0 | 0 |
| patient 051 | PSMA-PET | 0   | 0 | 0 | 0 | 0 | 0 | 0 | 0 | 0 | 1 | 1 | 1 | 1 | 1 | 0 | 0 | 0 |
| patient 052 | PSMA-PET | 0   | 0 | 0 | 0 | 1 | 0 | 1 | 1 | 1 | 1 | 1 | 1 | 1 | 0 | 0 | 0 | 0 |
| patient 053 | PSMA-PET | 0   | 0 | 0 | 0 | 1 | 1 | 1 | 1 | 1 | 1 | 1 | 1 | 1 | 1 | 1 | 1 | 1 |
| patient 054 | PSMA-PET | 0   | 0 | 0 | 0 | 0 | 0 | 0 | 0 | 0 | 1 | 1 | 1 | 1 | 1 | 0 | 0 | 0 |
| patient 055 | PSMA-PET | 0   | 0 | 0 | 0 | 1 | 1 | 1 | 1 | 1 | 1 | 1 | 1 | 1 | 1 | 1 | 1 | 1 |
| patient 056 | PSMA-PET | 0   | 0 | 0 | 0 | 0 | 1 | 0 | 0 | 0 | 1 | 1 | 1 | 1 | 1 | 0 | 0 | 0 |
| patient 057 | PSMA-PET | 0   | 1 | 0 | 0 | 1 | 1 | 1 | 1 | 1 | 1 | 1 | 1 | 1 | 0 | 0 | 0 | 0 |
| patient 058 | PSMA-PET | 0   | 0 | 0 | 0 | 1 | 0 | 0 | 0 | 0 | 1 | 1 | 1 | 1 | 1 | 0 | 0 | 0 |
| patient 059 | PSMA-PET | 0   | 0 | 0 | 0 | 1 | 1 | 1 | 1 | 1 | 1 | 1 | 1 | 1 | 0 | 1 | 1 | 1 |
| patient 060 | PSMA-PET | 0   | 0 | 0 | 0 | 1 | 1 | 1 | 1 | 1 | 1 | 1 | 1 | 1 | 0 | 0 | 0 | 0 |
| patient 061 | PSMA-PET | 1   | 1 | 1 | 1 | 1 | 1 | 1 | 1 | 1 | 1 | 1 | 1 | 1 | 0 | 0 | 0 | 0 |
| patient 062 | PSMA-PET | 0   | 0 | 0 | 0 | 1 | 1 | 1 | 1 | 1 | 1 | 1 | 1 | 1 | 0 | 0 | 0 | 0 |
| patient 063 | PSMA-PET | 0   | 0 | 0 | 0 | 1 | 1 | 1 | 1 | 1 | 1 | 1 | 1 | 1 | 0 | 0 | 0 | 0 |
| patient 064 | PSMA-PET | 0   | 0 | 0 | 0 | 1 | 1 | 1 | 1 | 1 | 0 | 0 | 0 | 0 | 0 | 0 | 0 | 0 |
| patient 065 | PSMA-PET | 0   | 0 | 1 | 0 | 1 | 1 | 1 | 1 | 1 | 1 | 1 | 1 | 1 | 0 | 0 | 0 | 0 |
| patient 066 | PSMA-PET | 1   | 1 | 1 | 1 | 1 | 1 | 1 | 0 | 1 | 1 | 1 | 1 | 1 | 0 | 0 | 0 | 0 |
| patient 067 | PSMA-PET | 1   | 1 | 1 | 1 | 1 | 1 | 1 | 1 | 1 | 1 | 1 | 1 | 1 | 1 | 1 | 0 | 1 |

Notes: r1=reader 1; r2=reader 2; r3=reader 3; Tr=local; N=lymph node; 0=negative for prostate cancer lesions; 1=positive for prostate cancer lesions.

**SUPPLEMENTAL TABLE 7.** Interobserver agreement for visual image interpretation (PSMA-PET and CI) with 95% confidence intervals in parentheses.

|          | nmCRPC           | Local disease     | Nodal disease     | Bone disease      | Visceral disease  |
|----------|------------------|-------------------|-------------------|-------------------|-------------------|
| CI       | -                | 0.51 (0.41-0.62)  | 0.47 (0.37-0.58)  | 0.72* (0.62-0.82) | 0.66* (0.56-0.77) |
| PSMA-PET | 0.46 (0.32-0.60) | 0.81* (0.68-0.95) | 0.74* (0.60-0.87) | 0.95* (0.81-1.10) | 0.59 (0.46-0.73)  |

Notes: \*=substantial to almost perfect agreement
